# Supplementary material for: The Society of European Robotic Gynaecological Surgery (SERGS) Pilot Curriculum for robot assisted gynecological surgery
Source: Springer Nature journal article supplement (doi:10.1007/s00404-017-4612-5), 2017-12-12
Supplement: MOESM1 [file 15304328]

# The Society of European Robotic Gynaecological Surgery (SERGS) Pilot Curriculum for Robot Assisted Gynecological Surgery

**Peter Rusch<sup>a</sup>, Rainer Kimmig<sup>a</sup>, Fabrice Lecuru<sup>b</sup>, Jan Persson<sup>c</sup>, Jordi Ponce<sup>d</sup>, Michel Degueudre<sup>e</sup>, René Verheijen<sup>f</sup>**

<sup>a</sup>Department of Obstetrics and Gynaecology, University Hospital Duisburg-Essen, Essen, Germany

<sup>b</sup>Université Paris Descartes, Sorbonne Paris Cité, Faculté de Médecine, Paris, France  
Assistance Publique-Hôpitaux de Paris, Hôpital Européen Georges-Pompidou, Chirurgie Cancérologique Gynécologique et du Sein, Paris, France

<sup>c</sup>Department of Obstetrics and Gynaecology, Skane University Hospital and Lund University, Lund, Sweden

<sup>d</sup>Department of Obstetrics and Gynaecology, Universitat da Barcelona, Barcelona, Spain

<sup>e</sup>European Robotic and Minimal Invasive Surgery Institute (ORSI) cvba, Melle, Belgium

<sup>f</sup>Department of Gynaecological Oncology, University Medical Center, Utrecht, Netherlands

Corresponding Author:

Peter Rusch

Department of Obstetrics and Gynaecology

University Hospital Duisburg-Essen

Hufelandstr. 55

45147 Essen, Germany

Email: [peter.rusch@uk-essen.de](mailto:peter.rusch@uk-essen.de)

Phone: 0049-(0)201-723-85288

Fax: 0049-(0)201-723-5714)

ORCID ID: 0000-0002-4890-3503

## Suppl. Data: Tables

| Requirement                                                                                                                                                 |
|-------------------------------------------------------------------------------------------------------------------------------------------------------------|
| existing dedicated robot assisted surgery team with at least one surgeon dedicated to the subspecialty of training                                          |
| Committed and stable robot assisted surgery practice that is not under threat of major changes during the period of training                                |
| existing operation policy, procedure guidelines and treatment protocols for robot assisted surgery relevant to the training program                         |
| Clear policy of training the trainers portfolio                                                                                                             |
| Offer the opportunity of cross training and experience such as having an ongoing robot assisted surgery program/practice in colorectal and urologic surgery |
| adequate workload in robot assisted gynecological surgery in chosen area of training, for example                                                           |
| i. >300 robotic surgery cases/year                                                                                                                          |
| ii. >50 robotic gynecological surgery cases/year                                                                                                            |
| iii. >20 robot assisted oncological surgical cases per subspecialty/year                                                                                    |
| iv. >20 robotic gynecological surgery cases per surgeon/year                                                                                                |
| Mature Clinical Governance portfolio with minimum requirements:                                                                                             |
| i. ongoing audits of perioperative characteristics                                                                                                          |
| 1. total operative time                                                                                                                                     |
| 2. blood transfusion rate                                                                                                                                   |
| 3. conversion to laparotomy rate                                                                                                                            |
| 4. perioperative complications: type and rate                                                                                                               |
| 5. length of hospital stay                                                                                                                                  |
| ii. ongoing audits of programme efficiency reflecting financial accountability:                                                                             |
| 1. theatre utilization profile                                                                                                                              |
| 2. length of waiting list as compared to previous performance                                                                                               |
| 3. above selected audits as blood transfusion, conversion rates and lengths of hospital stay                                                                |
| iii. regular risk management and morbidity/mortality meetings to discuss relevant incidents                                                                 |

Tab.1: Criteria of eligibility as Center of Excellence for participation in SERGS-Pilot-Curriculum

| <b>First Period</b>                |                                                                                        |                                                                                                                                                                                                                            |                                                                                                |
|------------------------------------|----------------------------------------------------------------------------------------|----------------------------------------------------------------------------------------------------------------------------------------------------------------------------------------------------------------------------|------------------------------------------------------------------------------------------------|
| Basic Training: orientation&models |                                                                                        |                                                                                                                                                                                                                            |                                                                                                |
| Type of training                   | Training part                                                                          | Type of assessment                                                                                                                                                                                                         | Modality of verification                                                                       |
| Didactic                           | Knowledge of system<br>Knowledge of procedures                                         | Exam                                                                                                                                                                                                                       | Online module (manufacturer) or Supervisor                                                     |
| Dry skills                         | Use of console & instruments<br>Set-up of robot<br>Solving common (technical) problems | Participation                                                                                                                                                                                                              | Supervisor                                                                                     |
|                                    | Practice validated skills                                                              | Baseline Skills Evaluation (5Excercises/Exc.) (1=poor/5=excellent)<br>#1: Robotic docking and instrument insertion<br>#2: RingRollercoaster1<br>#3: RingRollercoaster2<br>#4: RingRollercoaster3<br>#5: RingRollercoaster4 | Supervisor<br><br>Exc.#2-5 substitutable by DaVinci Mimic Skills Simulator (dV) (if available) |
| Virtual                            | Learning the system                                                                    | Participation                                                                                                                                                                                                              | Online module (manufacturer) or Supervisor                                                     |
|                                    | Practice validated skills                                                              | Test (7Exc.)<br>#6: Camera&Clutching<br>#7: Endowrist Manipulation<br>#8: Energy&Dissection<br>#9: thread the rings<br>#10: suture sponge<br>#11: dots&needles<br>#12: interrupted suturing                                | DaVinci Mimic Skills Simulator (if available)                                                  |
| <b>Second Period</b>               |                                                                                        |                                                                                                                                                                                                                            |                                                                                                |
| Hands-on training (ORSI)           |                                                                                        |                                                                                                                                                                                                                            |                                                                                                |
| Didactic                           | Knowledge of system<br>Knowledge of procedures                                         | Participation                                                                                                                                                                                                              | ORSI-supervisor                                                                                |
| Virtual                            | Practice procedural skills<br>View/life surgery                                        | Test (dV)<br>Participation                                                                                                                                                                                                 | ORSI-supervisor                                                                                |
| Animal                             | Practice basic skills<br>Practice hysterectomy<br>Practice lymphadenectomy             | BSE/GEARS<br>NOTSS/OSATS<br>NOTSS/OSATS                                                                                                                                                                                    | ORSI-supervisor                                                                                |
| <b>Third Period</b>                |                                                                                        |                                                                                                                                                                                                                            |                                                                                                |
| In-house, mentored training        |                                                                                        |                                                                                                                                                                                                                            |                                                                                                |
| Didactic                           | Indciations&types of surgery                                                           | Exam                                                                                                                                                                                                                       | In-house-supervisor                                                                            |
| Virtual                            | Practice procedural skills                                                             | Test                                                                                                                                                                                                                       | dVMimic Skills Simulator                                                                       |
| Bedside                            | Stepwise hysterectomy<br>Stepwise lymphadenectomy                                      | NOTSS/OSATS                                                                                                                                                                                                                | In-house supervisor                                                                            |
|                                    | Perioperative care                                                                     | Participation                                                                                                                                                                                                              | In-house supervisor                                                                            |
|                                    | Video documentation of stepwise procedure                                              | GEARS                                                                                                                                                                                                                      | External supervisor                                                                            |

Tab. 2: Trisectional course of SERGS Pilot Curriculum (adapted from Schreuder et al. 2012)

| <b>Candidate</b>                 | <b>No.1</b>                                      | <b>No.2</b>                                      | <b>No.3</b>                                             | <b>No.4</b>                                        |
|----------------------------------|--------------------------------------------------|--------------------------------------------------|---------------------------------------------------------|----------------------------------------------------|
| <b>Origin</b>                    | Spain                                            | France                                           | Sweden                                                  | Germany                                            |
| <b>Age</b>                       | 32years                                          | 30years                                          | 42years                                                 | 39years                                            |
| <b>Center of Excellence</b>      | Hospital Belvitge, Barcelona                     | Europ. Hospital Pampidou, Paris                  | Skånes University Lund                                  | University of Duisburg-Essen                       |
| <b>Subspecialty (up-to-date)</b> | Oncology, Minimal Invasive Surgery, Open Surgery | Oncology, Minimal Invasive Surgery, Open Surgery | Oncology, Minimal Invasive Surgery (i.e. Endometriosis) | Oncology, Breast Surgery, Minimal Invasive Surgery |

Tab. 3: Characteristics of fellows and educational institution

| <b>Depth perception</b>                                                                                 |   |                                                                                                                         |   |                                                                                                               |
|---------------------------------------------------------------------------------------------------------|---|-------------------------------------------------------------------------------------------------------------------------|---|---------------------------------------------------------------------------------------------------------------|
| 1                                                                                                       | 2 | 3                                                                                                                       | 4 | 5                                                                                                             |
| Constantly overshoots target, wide swings, slow to correct                                              |   | Some overshooting or missing of target, but quick to correct                                                            |   | Accurately directs instruments in the correct plane to target                                                 |
| <b>Bimanual dexterity</b>                                                                               |   |                                                                                                                         |   |                                                                                                               |
| 1                                                                                                       | 2 | 3                                                                                                                       | 4 | 5                                                                                                             |
| Uses only one hand, ignores nondominant hand, poor coordination                                         |   | Uses both hands, but does not optimize interaction between hands                                                        |   | Expertly uses both hands in a complementary way to provide best exposure                                      |
| <b>Efficiency</b>                                                                                       |   |                                                                                                                         |   |                                                                                                               |
| 1                                                                                                       | 2 | 3                                                                                                                       | 4 | 5                                                                                                             |
| Inefficient efforts; many uncertain movements; constantly changing focus or persisting without progress |   | Slow, but planned movements are reasonably organized                                                                    |   | Confident, efficient and safe conduct, maintains focus on task, fluid progression                             |
| <b>Force sensitivity</b>                                                                                |   |                                                                                                                         |   |                                                                                                               |
| 1                                                                                                       | 2 | 3                                                                                                                       | 4 | 5                                                                                                             |
| Rough moves, tears tissue, injures nearby structures, poor control, frequent suture breakage            |   | Handles tissues reasonably well, minor trauma to adjacent tissue, rare suture breakage                                  |   | Applies appropriate tension, negligible injury to adjacent structures, no suture breakage                     |
| <b>Autonomy</b>                                                                                         |   |                                                                                                                         |   |                                                                                                               |
| 1                                                                                                       | 2 | 3                                                                                                                       | 4 | 5                                                                                                             |
| Unable to complete entire task, even with verbal guidance                                               |   | Able to complete task safely with moderate guidance                                                                     |   | Able to complete task independently without prompting                                                         |
| <b>Robotic control</b>                                                                                  |   |                                                                                                                         |   |                                                                                                               |
| 1                                                                                                       | 2 | 3                                                                                                                       | 4 | 5                                                                                                             |
| Consistently does not optimize view, hand position, or repeated collisions even with guidance           |   | View is sometimes not optimal. Occasionally needs to relocate arms. Occasional collisions and obstruction of assistant. |   | Controls camera and hand position optimally and independently. Minimal collisions or obstruction of assistant |

Tab. 4: Global Evaluative Assessment of Robotic Skills (GEARS) (adapted from [1]): a rating of 1 reflects the lowest level of performance while a rating of 5 is considered the highest proficiency. An overall performance score is derived by summing the ratings in each domain.

## References

- [1] Goh AC, Goldfarb DW, Sander JC, Miles BJ, Dunkin BJ. Global evaluative assessment of robotic skills: validation of a clinical assessment tool to measure robotic surgical skills. *J Urol* 2012; 187(1): 247–52  
[<https://doi.org/10.1016/j.juro.2011.09.032>][PMID: 22099993]
